1 **Leptin-receptor neurons in the dorsomedial hypothalamus regulate the timing of circadian**  
2 **rhythms in feeding and metabolism in mice**

3

4 Chelsea L. Faber<sup>1</sup>, Jennifer D. Deem<sup>1</sup>, Bao Anh Phan<sup>1</sup>, Tammy P. Doan<sup>1</sup>, Kayoko Ogimoto<sup>1</sup>,  
5 Zaman Mirzadeh<sup>2</sup>, Michael W. Schwartz<sup>1</sup>, Gregory J. Morton<sup>1</sup>

6

7 <sup>1</sup>UW Medicine Diabetes Institute, Department of Medicine, University of Washington, Seattle,  
8 WA, 98109, USA.

9 <sup>2</sup>Department of Neurosurgery, Barrow Neurological Institute, Phoenix, AZ, 85013, USA.

10

11 **Address for correspondence:**

12 Gregory J Morton

13 Department of Medicine, University of Washington

14 UW Medicine at South Lake Union

15 750 Republican St, F770

16 Seattle, WA 98109, USA

17 Phone: (206)897-5280

18 Email: [gjmorton@u.washington.edu](mailto:gjmorton@u.washington.edu)

19 **Abstract**

20 Animal behavior and metabolism are tightly coordinated with sleep-wake cycles governed by the  
21 brain in harmony with environmental light:dark cycles. Within the brain, the dorsomedial  
22 hypothalamic nucleus (DMH) has been implicated in the integrative control of feeding, energy  
23 homeostasis, and circadian rhythms [1], but the underlying cell types are unknown. Here, we  
24 identify a role for DMH leptin receptor-expressing neurons (DMH<sup>LepR</sup>) in these effects. Using a  
25 viral approach, we show that silencing DMH<sup>LepR</sup> neurons in adult mice not only increases body  
26 weight and adiposity, but also shifts circadian rhythms in feeding and metabolism into the light-  
27 cycle. Moreover, DMH<sup>LepR</sup> silencing abolishes the normal increase in dark-cycle locomotor activity  
28 characteristic of nocturnal rodents. Furthermore, DMH<sup>LepR</sup>-silenced mice fail to entrain to a  
29 restrictive change in food availability. Together, these findings identify DMH<sup>LepR</sup> neurons as  
30 critical determinants of the daily time of feeding and associated metabolic rhythms.

31

32 **Introduction**

33 Synchrony between behavior and environmental rhythms enables animals to predict food  
34 availability and optimize metabolism in anticipation of daily periods of fasting and feeding [1].  
35 Conversely, mistimed feeding (i.e., food consumption during the normal resting period) impairs  
36 metabolism and increases susceptibility to obesity and associated metabolic impairment [2, 3].  
37 While the hypothalamic suprachiasmatic nucleus (SCN) is well-known to entrain circadian  
38 rhythmicity in accordance with light:dark cycles, food availability can also entrain metabolic  
39 rhythms independently from the SCN [2]. Illustrating this point, although rodents with SCN  
40 lesions exhibit profound disruptions in circadian rhythms, they retain the ability to re-train  
41 metabolic and behavioral rhythms in accordance with a scheduled meal [3]. Moreover, scheduled  
42 feeding has no effect on rhythmic gene expression in the SCN [4], suggesting the existence of  
43 extra-SCN food-entrainable oscillators that function to align behavior and metabolism with food  
44 availability [1]. Although somewhat controversial [5], evidence suggests the DMH may play such  
45 a role [1]. Firstly, the DMH is innervated by the SCN [6], and DMH neurons in turn project to  
46 neurons in brain areas regulating metabolism and feeding, including agouti-related protein  
47 (AgRP) neurons in the arcuate nucleus (ARC) [7, 8]. Moreover, DMH lesioning in rats not only  
48 disrupts circadian rhythms in feeding, locomotion, and core temperature [9, 10], but also  
49 precludes entrainment to scheduled feeding [9]. However, the relevant DMH cell types mediating  
50 these effects are unknown. Based on recent evidence that DMH neurons expressing leptin  
51 receptor (DMH<sup>LepR</sup>) are both sensitive to food availability and make synaptic connections with  
52 AgRP neurons to modulate feeding [7], we identified DMH<sup>LepR</sup> neurons as a candidate population  
53 for the circadian control of food intake and associated metabolic rhythms.

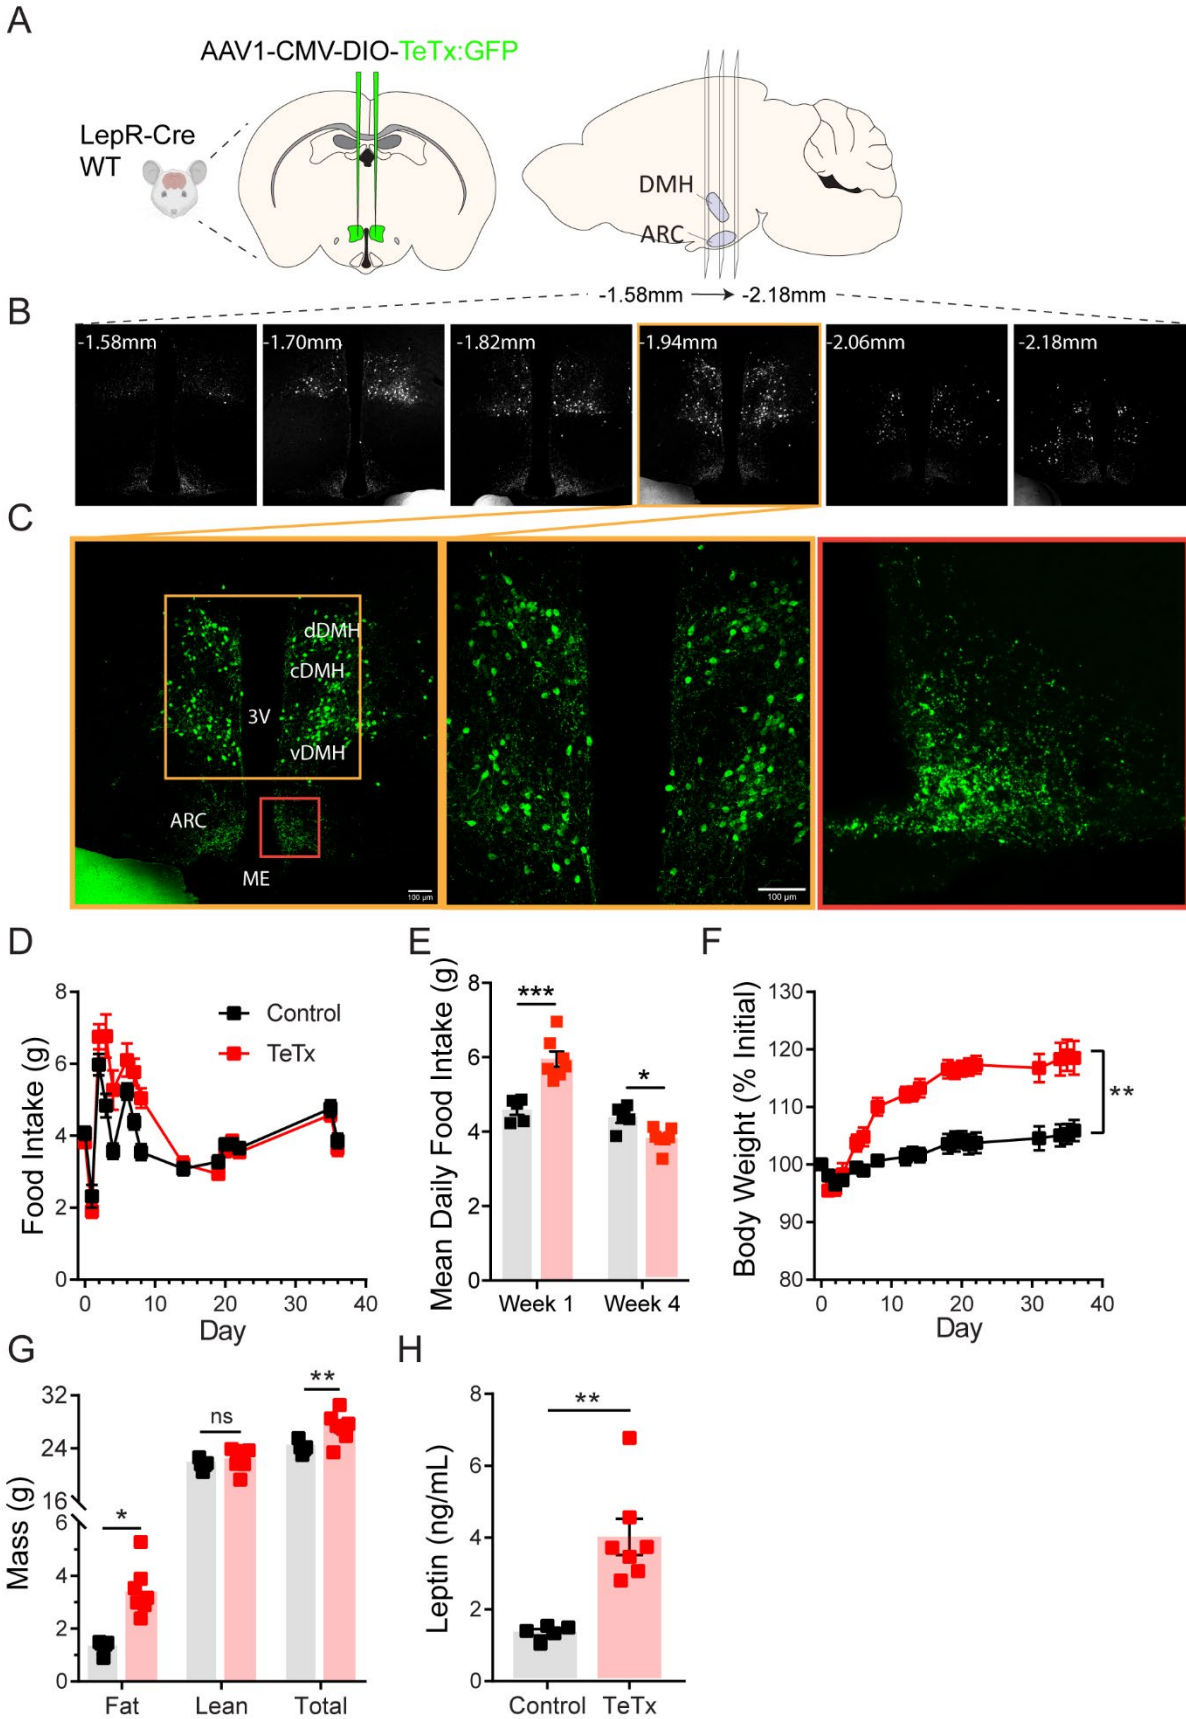

**Figure 1 Silencing DMH<sup>LepR</sup> neurons elicits transient hyperphagia and increased adiposity in adult male mice.**

(A) Experimental schematic for chronic inhibition of DMH<sup>LepR</sup> neurons by microinjection on Day 0 of an AAV1 containing a Cre-dependent GFP-fused TeTx delivered bilaterally to the DMH LepR-Cre+ male mice (TeTx; n=7) and Cre- littermate controls (Control; n=7).

(B) Stereological fluorescent images from a representative animal showing the rostral-caudal extent of TeTx:GFP expression.

(C) *Left*: Colorized, higher magnification view of the boxed orange region from (B). *Middle*: Higher magnification view of the boxed orange region showing neuronal cell bodies targeted within the DMH. *Right*: Higher magnification view of the boxed red region showing TeTx:GFP+ terminals of targeted DMH<sup>LepR</sup> neurons within the ARC

(D) Mean daily food intake following viral microinjection. Two-way ANOVA:  $F_{(1,10)}=4.658$ ;  $p=0.0563$  (main effect of TeTx);  $F_{(14,140)}=4.886$ ;  $p<0.0001$  (time x TeTx interaction).

(E) Mean daily food intake from Week 1 relative to Week 4. Two-way ANOVA:  $F_{(1,10)}=5.575$ ;  $p=0.0399$  (main effect of TeTx);  $F_{(1,10)}=39$ ;  $p<0.001$  (time x TeTx interaction).

(F) Body weight expressed as %Day 0 value. Two-way ANOVA:  $F_{(1,10)}=20.18$ ;  $p=0.0012$  (main effect of TeTx).  $F_{(19,190)}=14.67$ ;  $p<0.0001$  (time x TeTx interaction).

(G) Fat, lean, and total mass 26 days after viral microinjection. Multiple t-tests;  $t_{fat}=4.847$ ;  $p=0.0014$ ;  $t_{total}=2.884$ ;  $p=0.016$ .

(H) Plasma leptin 21 days after viral microinjection. Unpaired t-test,  $t=5.17$ ,  $p=0.0017$ .

Data are mean  $\pm$  SEM. For repeated measures, post hoc, Sidak's test for each time point are indicated on the graph. \* $p<0.05$ , \*\* $p<0.01$ , \*\*\* $p<0.001$ , \*\*\*\* $p<0.0001$

54

## 55 Results and Discussion

56

### 57 Inactivation of DMH<sup>LepR</sup> neurons elicits transient hyperphagia and increased adiposity

58 To determine the role of DMH<sup>LepR</sup> neurons in feeding and metabolism, we used a viral loss-of-  
59 function approach (Figure 1A). Specifically, DMH<sup>LepR</sup> neurons were permanently silenced  
60 following bilateral microinjection of an AAV encoding Cre-dependent tetanus toxin light-chain  
61 fused with a GFP reporter (AAV1-CBA-DIO-GFP:TeTx) [11]. Viral transduction was confirmed by  
62 histochemical detection of GFP in the DMH (Figure 1B-C); as expected, GFP was undetected in  
63 Cre-negative controls (not shown). Outside of the DMH, abundant GFP+ terminals were detected  
64 in the ARC (Figure 1B-C), consistent with previous evidence of a DMH<sup>LepR</sup>  $\rightarrow$  ARC<sup>AgRP</sup> neurocircuit  
65 implicated in feeding control [7, 12].

66 Whereas previous evidence showed no effect of acute inhibition of DMH<sup>LepR</sup> neurons on  
67 feeding [7], chronic inactivation of DMH<sup>LepR</sup> neurons resulted in hyperphagia that was sustained  
68 for several days (Figure 1D-E), an effect associated with sustained weight gain (Figure 1F) and a  
69 selective increase in adipose mass (Figure 1G), despite daily food intake eventually falling below  
70 that of controls (Figure 1E). These effects were accompanied by modestly increased plasma leptin  
71 levels (Figure 1H) and elevated fasted levels of both blood glucose (Control vs. TeTx:  $72 \pm 5.621$   
72 vs.  $107.1 \pm 7.295$ ,  $t_{9.969}=3.816$ ;  $p=0.003$ ) and plasma insulin (Control vs. TeTx:  $0.49 \pm 0.0419$  vs.  
73  $1.244 \pm 0.1229$ ,  $t_{6.092}=5.807$ ;  $p=0.001$ ), suggestive of insulin resistance. These findings extend and  
74 refine previous work implicating a physiological role for DMH<sup>LepR</sup> neurons in energy homeostasis  
75 [7, 12].

76

### 77 DMH<sup>LepR</sup> neurons are required for inhibition of feeding by leptin

78 As leptin signaling in the DMH has been implicated in the acute anorexic effect of leptin [13], we  
79 tested whether DMH<sup>LepR</sup> inactivation blunts leptin-mediated anorexia. First, the specificity of

80 GFP:TeTx expression in DMH<sup>LepR</sup> neurons was confirmed by establishing that leptin-induced  
 81 pSTAT3, a marker for LepR signaling, colocalizes with virally-transduced cells following systemic  
 82 leptin injection (Figure 2A). Next, control and DMH<sup>LepR</sup>-silenced mice were fasted for 24 h  
 83 followed by ip injection of either leptin or saline control, after which food was returned. Although  
 84 control animals lost more weight during the fast (Figure 2B) and exhibited a greater refeeding  
 85 response following saline-treatment than saline-treated TeTx mice (Figure 2C; dashed bars), the  
 86 effect of leptin to suppress food intake was absent in DMH<sup>LepR</sup>-silenced mice (Figure 2C; solid  
 87 bars). These findings extend previous evidence [13] of a key role for DMH<sup>LepR</sup> neurons in leptin-  
 88 mediated suppression of fasting-induced refeeding.

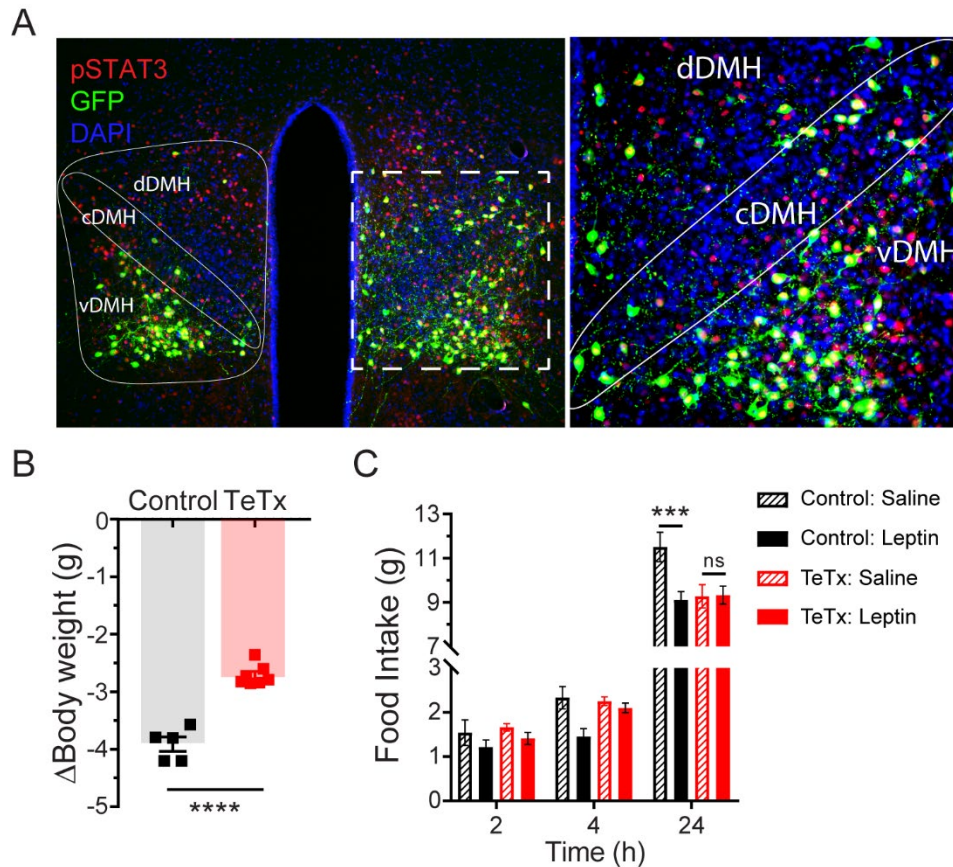

**Figure 2 Validation of DMH<sup>LepR</sup> neuronal targeting and evidence that activation of these neurons is required for leptin-induced anorexia.**

(A) Left: Representative image showing extensive overlap of pSTAT3 expression in GFP:TeTx-expressing DMH<sup>LepR</sup> neurons in mice sacrificed 90 minutes following leptin administration (i.p. 3 mg/kg). Right: Higher magnification view of the boxed region from the left.

(B) Change in body weight (unpaired T-test,  $t=8.483$ ,  $p=0.0001$ ) following a 24h (ZT2 – ZT2') fast 5 weeks following viral microinjection and before food was returned in (C).

(C) Post-fast (24h) refeeding following i.p. injection of saline or leptin (3 mg/kg). Two-way ANOVA:  $F(1,4)=47.33$ ;  $p=0.0023$  (Controls, main effect of leptin).  $F(1,6)=0.1203$ ;  $p=0.7405$  (TeTx, main effect of leptin).

v-, c-, and dDMH = ventral, central, and dorsal compartments of the dorsomedial hypothalamic nucleus, respectively; 3V = 3rd ventricle; ARC = arcuate nucleus; ME = median eminence.

Data are mean  $\pm$  SEM. For repeated measures, post hoc, Sidak's test at each time point are indicated on the graph.

\* $p<0.05$ , \*\*\* $p<0.001$ , \*\*\*\* $p<0.0001$ .

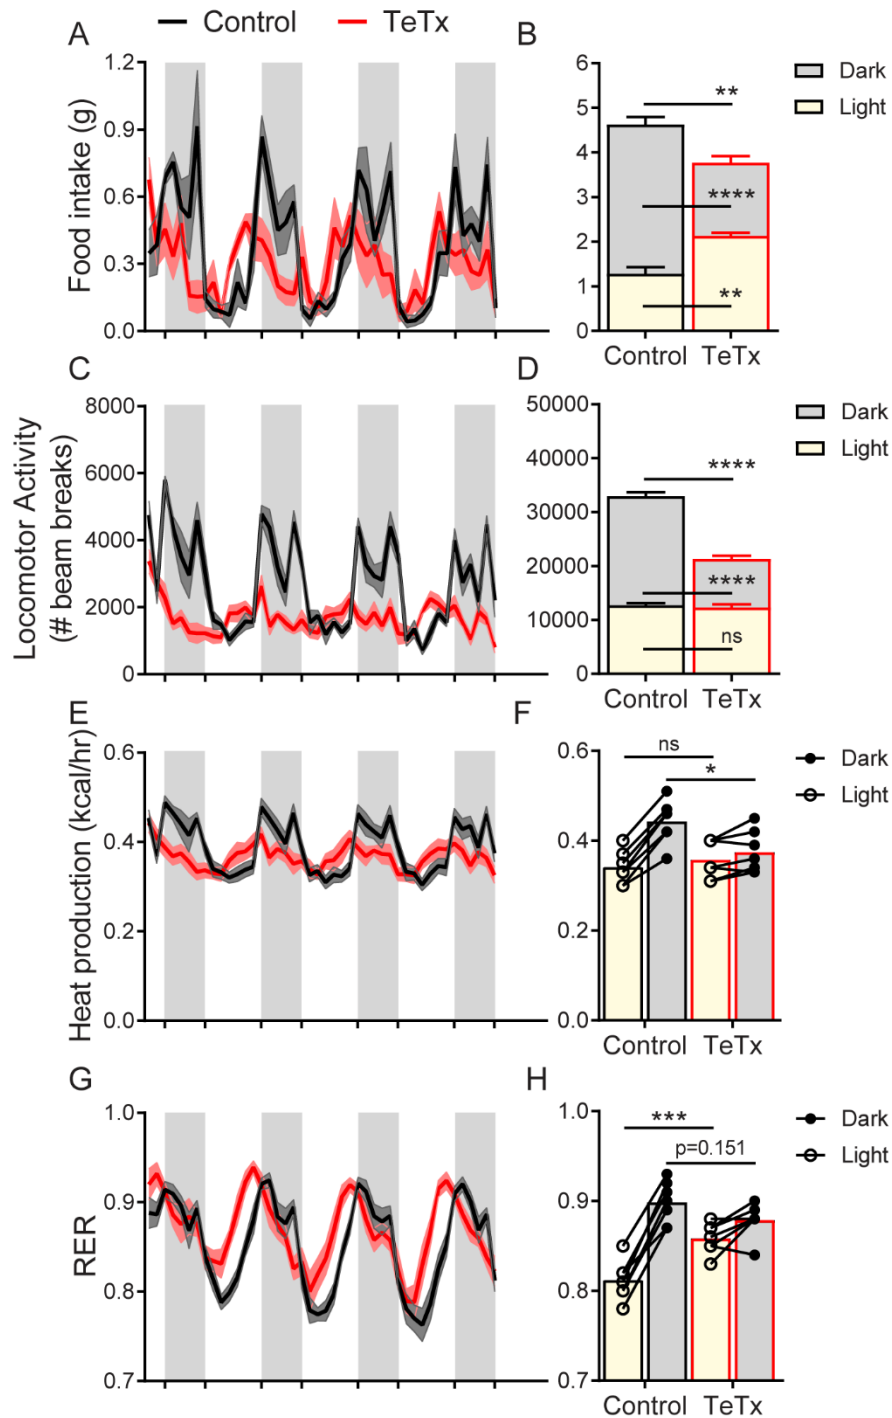

**Figure 3 DMH<sup>LepR</sup> neuron inactivation disrupts circadian patterns of food intake, locomotor activity, heat production, and substrate utilization.**

2h-binned continuous measures (left panels) and mean values across the light (L) and dark (D) periods (right panels) 30 days following microinjection of TeTx:GFP (TeTx; n=7) or GFP control (Control; n=7) to the DMH of LepR-Cre+ male mice.

(A) Food intake. Two-way ANOVA:  $F(1,12)=12$ ;  $p=0.0047$  (main effect of TeTx).  $F(87,1044)=2.354$ ;  $p<0.0001$  (time x TeTx interaction).

(B) Mean food intake from A during L, D, and 24h-period. Two-way ANOVA:  $F(1,12)=9.567$ ;  $p=0.0093$  (main effect of TeTx).

(C) Locomotor activity. Two-way ANOVA:  $F(1,12)=93.22$ ;  $p<0.0001$  (main effect of TeTx).

(D) Mean locomotor activity from C during L, D, and 24h-period. Two-way ANOVA:  $F(1,12)=110.4$ ;  $p<0.0001$  (main effect of TeTx).

(E) Heat production. Two-way ANOVA:  $F(1,12)=1.006$ ;  $p=0.3357$  (main effect of TeTx).

(F) Mean heat production from E during L and D periods. Two-way ANOVA:  $F(1,12)=1.209$ ;  $p=0.2930$  (main effect of TeTx).

(G) Respiratory exchange ratio (RER). Two-way ANOVA:  $F(1,12)=2.789$ ;  $p=0.1208$  (main effect of TeTx).

(H) Mean RER from G during L and D periods. Two-way ANOVA:  $F(1,12)=2.04$ ;  $p=0.1788$  (main effect of TeTx).

Data are mean  $\pm$  SEM. For repeated measures, post hoc, Sidak's test at each time point are indicated on the graph.

\* $p<0.05$ , \*\* $p<0.01$ , \*\*\* $p<0.001$ , \*\*\*\* $p<0.0001$ .

90

## 91 **DMH<sup>LepR</sup> inactivation disrupts diurnal feeding, locomotion, and metabolic rhythms**

92 To determine whether the observed impairments in energy homeostasis were associated with  
93 changes in circadian rhythmicity, we obtained continuous measures of energy intake, energy  
94 expenditure, and locomotor activity using indirect calorimetry. We found that unlike control  
95 mice, which exhibited typical nocturnal feeding behavior, the phase of food intake was shifted in  
96 DMH<sup>LepR</sup>-silenced mice (Figure 3A), such that dark-cycle food intake was decreased and light-  
97 cycle intake increased (Figure 3B). Similarly, while control mice displayed a typical increase in  
98 dark-cycle locomotor activity, this was absent in DMH<sup>LepR</sup>-silenced mice (Figure 3C-D). Rhythms  
99 in other metabolic parameters were similarly shifted and blunted by DMH<sup>LepR</sup> inactivation.  
100 Specifically, we found that heat production in DMH<sup>LepR</sup>-silenced mice was reduced selectively in  
101 the dark cycle (Figure 3E-F) and respiratory-exchange ratio (RER) was elevated in the light cycle  
102 (Figure 3G-H), indicative of an increase in carbohydrate utilization consistent with the increased  
103 feeding during this time (Figure 3A-B). Together, these findings identify DMH<sup>LepR</sup> neuron activity  
104 as a crucial determinant of appropriately timed circadian rhythms in feeding, locomotor activity,  
105 and associated metabolic parameters.

106

## 107 **Female DMH<sup>LepR</sup>-silenced mice recapitulate weight gain and circadian disruption seen in males**

108 We also tested whether the phenotype is conserved between sexes. Although female DMH<sup>LepR</sup>-  
109 silenced mice did not exhibit the transient hyperphagia observed in males (Supplemental Figure  
110 2A-B), they nonetheless developed mild obesity (Supplemental Figure 2C-D). Females also  
111 exhibited disrupted circadian rhythms in food intake (Supplemental Figure 3A-B), locomotor  
112 activity (Supplemental Figure 3C-D), heat production (Supplemental Figure 3E-F), and RER  
113 (Supplemental Figure 3G-H) similar to those observed in male DMH<sup>LepR</sup>-silenced mice. The key  
114 role for DMH<sup>LepR</sup> neurons in circadian behavioral and metabolic control identified in males,  
115 therefore, extends to females as well. Given that, compared to male mice [14], female mice are  
116 protected from both hyperphagia and disrupted circadian rhythms with HFD [15], future studies  
117 are warranted to determine whether sensitivity to HFD is intact in both male and female mice  
118 with DMH<sup>LepR</sup> inactivation and if the DMH lies downstream of circuits mediating sexually-  
119 dimorphic responses to HFD.

120

## 121 **Silencing DMH<sup>LepR</sup> neurons prevents behavioral adaptation to restricted feeding**

122 To determine the extent to which circadian disruptions in metabolism in DMH<sup>LepR</sup>-silenced mice  
123 are secondary to the shift in daily patterns of food intake and whether DMH<sup>LepR</sup> neurons are  
124 required to entrain feeding behavior, a time-restricted feeding (TRF) paradigm was implemented.

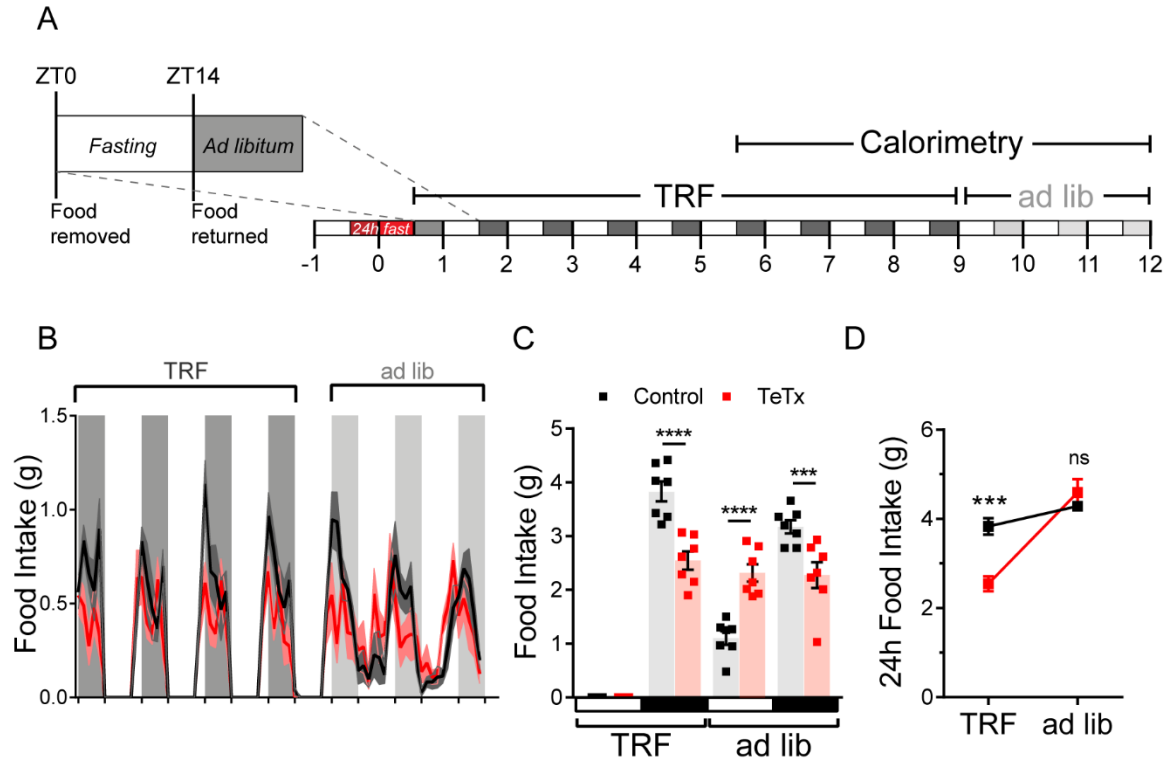

**Figure 4 DMH<sup>LepR</sup> neurons are required for adaptation to a dark-cycle restricted feeding schedule.**

(A) Experimental timeline. 6 weeks following microinjection of GFP:TeTx (TeTx; n=7) or GFP control (Control; n=7) to the DMH of LepR-Cre+ male mice, mice were acclimated to time-restricted feeding (TRF) in their home cages for a 5 day lead-in before transfer into direct calorimetry. TRF was maintained in calorimetry for an additional 4 days, followed by ad libitum (ad lib) feeding.

(B) 2h-binned continuous measures of food intake during TRF and transition back to ad lib feeding.

(C) Mean L:D food intake from B under TRF and ad lib feeding. Two-way ANOVA:  $F_{(1,12)}=5.084$ ;  $p=0.0436$  (main effect of TeTx);  $F_{(3,36)}=27.91$ ;  $p<0.0001$  (time x TeTx interaction).

(D) Mean 24h-period food intake from C during TRF and ad lib feeding. Two-way ANOVA:  $F_{(1,12)}=5.097$ ;  $p=0.0434$  (main effect of TeTx);  $F_{(1,12)}=47.8$ ;  $p<0.0001$  (main effect of TRF);  $F_{(1,12)}=19.58$ ;  $p=0.0008$  (TRF x TeTx interaction). Within treatment comparison (TRF vs ad lib): Control  $t_{(12)}=1.759$ ;  $p=0.1971$ ; TeTx  $t_{(12)}=8.018$ ;  $p<0.0001$ .

Data are mean  $\pm$  SEM. For repeated measures, post hoc, Sidak's test at each time point are indicated on the graph. \* $p<0.05$ , \*\* $p<0.01$ , \*\*\* $p<0.001$ , \*\*\*\* $p<0.0001$ .

125

126 We restricted food availability to the dark-cycle, active period (ZT14-ZT24) in both DMH<sup>LepR</sup>-  
127 silenced and control mice. After a 5-day TRF acclimation period, both groups were subjected to  
128 indirect calorimetry for 5 days during TRF followed by 3 days of *ad libitum* feeding (Figure 4A).

129 During TRF acclimation, body weight oscillated daily as expected in both groups, being  
130 higher after food was available during the dark cycle, and lower after light-cycle fasting. However,  
131 unlike control mice which were able to maintain their weight during TRF, DMH<sup>LepR</sup>-silenced mice  
132 exhibited a small reduction in body weight (Supplemental Figure 4B), likely because control mice  
133 compensated for the imposed light-cycle fast by increasing dark-cycle food intake unlike the  
134 DMH<sup>LepR</sup>-silenced mice (Figure 4B-D). Upon restoration of *ad libitum* feeding, DMH<sup>LepR</sup>-silenced  
135 mice exhibited rebound hyperphagia sufficient to recover lost weight (Figure 4B-D). Interestingly,  
136 this hyperphagic response was limited to the light cycle, as DMH<sup>LepR</sup>-silenced mice rapidly  
137 reverted to their mistimed feeding rhythms (Figure 4B-C). Together, these findings indicate that



138 DMH<sup>LepR</sup> neuron activity is required to entrain feeding behavior during dark-cycle TRF. Although  
139 mechanisms underlying this adaptive response await further study, the capacity to increase  
140 intake when food is available for a restricted window each day requires the ability to anticipate  
141 when food will be available in association with a variety of metabolic and neuroendocrine  
142 adaptations, e.g., [16]. Our findings also reveal that although DMH<sup>LepR</sup>-silenced mice are capable  
143 of mounting rebound hyperphagia following weight loss, this response appears to require *ad*  
144 *libitum* access to food during the light-cycle, a time when normal mice consume little food.

145

## 146 **Conclusion**

147 Our work identifies a crucial physiological role for DMH<sup>LepR</sup> neurons in circadian regulation of  
148 feeding behavior, locomotion, and associated metabolic parameters. Activity of these neurons is  
149 also necessary to adapt feeding during a restricted feeding paradigm. Given evidence from both  
150 humans and rodents that mistimed feeding can predispose to obesity and T2D [17, 18], these  
151 findings have relevance to the pathogenesis of both disorders. An improved understanding of the  
152 neural circuits underlying endogenous rhythms of behavior, feeding, and metabolism may  
153 facilitate the development of new therapeutic and dietary strategies for the treatment of obesity  
154 and related metabolic disorders in humans.

## 155 **Research design and methods**

156

### 157 **Mice**

158 All procedures were performed in accordance with the National Institutes of Health Guide for the  
159 Care and Use of Laboratory Animals and were approved by the Animal Care Committee at the  
160 University of Washington. Following stereotaxic surgery, all studied animals were individually  
161 housed with ad libitum access to standard chow diet (LabDiet 5053) in a temperature and  
162 humidity-controlled facility with 14:10 light:dark cycles. Adult *Lep<sup>r</sup><sup>RES-Cre/+</sup>* (LepR-Cre) mice  
163 (Jackson Laboratory no. 008320) were used for all experiments, unless otherwise noted.

164

### 165 **Stereotactic Surgeries**

166 The viral vector AAV1-CBA-DIO-GFP:TeTx (TeTx) was generated as described [19], and generously  
167 provided by Dr. Richard Palmiter and Dr. Larry Zweifel (University of Washington, Seattle, WA).  
168 For viral microinjection, animals were placed in a stereotaxic frame (Kopf 1900; Cartesian  
169 Research Inc., Tujunga, CA) under isoflurane anesthesia. The skull was exposed with a small  
170 incision, and two small holes were drilled for bilateral 200-nL injection volume of TeTx into the  
171 DMH of LepR-Cre or Cre-negative littermate mice based on coordinates from the Mouse Brain  
172 Atlas [20]: anterior-posterior (AP) -1.6, dorsal-ventral (DV) -5.6 mm, and lateral 0.40 mm. Adeno-  
173 associated virus (AAV) was delivered using a Hamilton syringe with a 33-gauge needle at a rate  
174 of 50 nL/min (Micro4 controller), followed by a 5-min wait at the injection site and a 1-min wait  
175 0.05 mm dorsal to the injection site before needle withdrawal. Animals received a perioperative  
176 subcutaneous injection of buprenorphine hydrochloride (0.05 mg/kg) (Reckitt Benckiser,  
177 Richmond, VA). Viral expression was verified post hoc in all animals, and any data from animals  
178 in which the virus expressed outside the targeted area were excluded from the analysis.

179

### 180 **Body Composition Analysis**

181 Measurements of body lean and fat mass were determined in live, conscious mice by use of  
182 quantitative magnetic resonance spectroscopy (QMR; EchoMRI-700TM; Echo MRI, Houston, TX)  
183 by the University of Washington Nutrition Obesity Research Center (NORC) Energy Balance Core.

184

### 185 **Leptin effects on food intake and pSTAT3-induction**

186 To validate the ability of leptin to elicit pSTAT3 signaling in DMH<sup>Lep<sup>R</sup></sup> neurons, ad lib fed mice were  
187 injected intraperitoneally with leptin (5 mg/kg; Dr. Parlow; National Hormone Peptide Program)  
188 and perfused 90 min later, as described below.

189 To assess the ability of leptin to suppress the compensatory hyperphagia that normally  
190 follows a prolonged fast, mice were fasted for 24 h from ZT2 – ZT2'. On the second day, leptin (3  
191 mg/kg) or vehicle-control (PBS, pH 7.9) was injected intraperitoneally in mice 15 min before  
192 preweighed food was placed back in the cage, and intake was monitored for the following 24 h.

193

### 194 **Indirect Calorimetry, Food Intake, and Activity**

195 Mice were acclimated to calorimetry cages prior to study and data collection. Energy expenditure  
196 measurements were obtained by a computer-controlled indirect calorimeter System  
197 (Promethion, Sable Systems, Las Vegas NV) with support from the Energy Balance Core of the  
198 NORC at the University of Washington, as previously described [21]. Oxygen consumption (VO<sub>2</sub>)

199 and carbon dioxide production (VCO<sub>2</sub>) were measured for each mouse for 1-min at 10-min  
200 intervals, and food and water intakes were measured continuously while mice were housed in a  
201 temperature- and humidity-controlled cabinet (Caron Products and Services, Marietta, OH NV).  
202 Ambulatory activity was determined simultaneously and beam breaks in the x-, y- and z-axes  
203 were scored as an activity count, and a tally was recorded every 10 min. Data acquisition and  
204 instrument control were coordinated by MetaScreen v.1.6.2, and raw data were processed using  
205 ExpeData v.1.4.3 (Sable Systems, Las Vegas, NV) using an analysis script documenting all aspects  
206 of data transformation.

207

### 208 **Time Restricted Feeding (TRF)**

209 Food was removed each morning at the start of the light cycle (ZT0) and returned at the start of  
210 the dark cycle (ZT14); body weight was also measured at both ZT0 and ZT14 daily. To eliminate  
211 the initial effects of varying fed status of animals, 1 day before TRF animals were fasted for 24 h  
212 from ZT14 (on Day -1) to ZT14' (on Day 0) before TRF began. Animals were then subjected to  
213 indirect calorimetry for 5 additional days during TRF before returning to ad lib feeding for the  
214 remaining 3 days of study (Figure 4A).

215

### 216 **Immunohistochemistry**

217 For brain immunohistochemical (IHC) analyses, animals were terminally anesthetized with  
218 ketamine:xylazine and transcardially perfused with phosphate-buffered saline (PBS) followed by  
219 4% paraformaldehyde (PFA) in 0.1 mol/L PBS. Brains were removed and postfixed overnight, then  
220 transferred into 30% sucrose overnight or until brains sunk in solution. Brains were subsequently  
221 sectioned on a freezing-stage microtome (Leica) to obtain 30 $\mu$ m coronal sections in four series.  
222 A single series of sections per animal was used in histological studies, and the remainder stored  
223 in -20 °C in cryoprotectant. Brain sections were washed in PBS with Tween-20, pH 7.4 (PBST)  
224 overnight at 4C. Sections were then washed at room temperature in PBST (3x8 min), followed by  
225 a blocking buffer (5% normal donkey serum (NDS), 1% bovine serum albumin (BSA) in PBST with  
226 azide) for 60 minutes with rocking. Sections were then incubated overnight at 4C in blocking  
227 buffer containing primary antiserum (goat anti-GFP, Fitzgerald, 1:1000; rabbit anti-  
228 pSTAT3, Sigma-Aldrich, St Louis, Missouri, 1:1000). Next, sections were washed (3 x 8 min) in  
229 PBST before incubating in secondary donkey anti-goat IgG Alexa 488 (Jackson ImmunoResearch  
230 Laboratories, West Grove, PA) diluted 1:1000 in blocking buffer. Sections were washed (3 x 8 min)  
231 in PBST before incubating with DAPI for 8 minutes, followed by a final wash (3 x 10 min) in PBS.  
232 Sections were mounted to slides and imaged using a Leica SP8X confocal.

233

### 234 **Tissue Processing, Blood Collection**

235 Tail blood for plasma hormonal measurement was collected at indicated times. Blood was  
236 collected via EDTA-coated capillary tubes and centrifuged at 4 °C (7,000 rpm, 4 min) and plasma  
237 was subsequently removed and stored at -80 °C for subsequent assay. Plasma leptin (Crystal  
238 Chem, Elk Grove Village, IL; #90030) and plasma insulin (Crystal Chem, Elk Grove Village, IL;  
239 #90080) were determined by ELISA.

240

### 241 **Statistical Analyses**

242 All results are presented as means  $\pm$  SEM. *P* values for unpaired comparisons were calculated by  
243 two-tailed Student's *t* test. Time course comparisons between groups were analyzed using a two-  
244 way repeated measures ANOVA with main effects of treatment (control vs. TeTx) and time. All  
245 post hoc comparisons were determined using Sidak's correction for multiple comparisons. All  
246 statistical tests indicated were performed using Prism (version 7.4; GraphPad, CA) software.

247

#### 248 **Acknowledgements:**

249 We thank R. Palmiter, C. Campos, L. Zweifel, and M. Baird for producing the TeTx virus, J. T.  
250 Nelson for assistance with metabolic experiments, and V. Damian for maintaining the mouse  
251 colony. We also thank R. Palmiter for editing the manuscript. We are grateful to N. Peters at the  
252 University of Washington Keck Imaging Center for technical assistance and the National Institutes  
253 of Health (S10-OD-016240) for support to the W.M. Keck Foundation Center for Advanced  
254 Studies in Neural Signaling. This work was supported by NIH grants F31-DK113673 (C.L.F.), T32-  
255 GM095421 (C.L.F.), DK089056 and DK124238 (G.J.M.), DK083042 and DK101997 (M.W.S.); the  
256 NIDDK-funded Nutrition Obesity Research Center (DK035816) and Diabetes Research Center  
257 (DK017047) and the Diabetes, Obesity and Metabolism (T32 DK007247; C.L.F.) and Nutrition,  
258 Obesity and Atherosclerosis (T32 HL007028; J.D.D.) Training Grants at the University of  
259 Washington; a Dick and Julia McAbee Endowed Fellowship (J.D.D.); an American Diabetes  
260 Association Innovative Basic Science Award (ADA 1-19-IBS-192) (G.J.M.); and an American  
261 Diabetes Association Fellowship Grant (ADA 1-19-PDF-103) (J.D.D.).

262

#### 263 **Author Contributions**

264 C.L.F. conceived and designed research studies, performed stereotaxic surgeries, acquired and  
265 analyzed data, and wrote and edited the manuscript. J.D.D., B.A.P., and T.P.D. provided technical  
266 assistance with histology and longitudinal animal monitoring. K.O. performed calorimetry  
267 experiments. Z.M., M.W.S., and G.J.M. provided guidance and resources and revised the  
268 manuscript. All authors approved the final version of the manuscript.

269

#### 270 **Competing Interests:**

271 The authors declare that no competing interests exist.

272

273 **References**

274

- 275 1. Saper CB, Lu J, Chou TC, Gooley J (2005) The hypothalamic integrator for circadian  
276 rhythms. *Trends Neurosci* 28(3):152–157. <https://doi.org/10.1016/j.tins.2004.12.009>
- 277 2. Greco CM, Sassone-Corsi P (2019) Circadian blueprint of metabolic pathways in the  
278 brain. *Nat Rev Neurosci* 20(2):71–82. <https://doi.org/10.1038/s41583-018-0096-y>
- 279 3. Stephan FK, Swann JM, Sisk CL (1979) Entrainment of circadian rhythms by feeding  
280 schedules in rats with suprachiasmatic lesions. *Behav Neural Biol* 25(4):545–554.  
281 [https://doi.org/10.1016/S0163-1047\(79\)90332-7](https://doi.org/10.1016/S0163-1047(79)90332-7)
- 282 4. Damiola F, Le Minli N, Preitner N, Kornmann B, Fleury-Olela F, Schibler U (2000)  
283 Restricted feeding uncouples circadian oscillators in peripheral tissues from the central  
284 pacemaker in the suprachiasmatic nucleus. *Genes Dev* 14(23):2950–2961.  
285 <https://doi.org/10.1101/gad.183500>
- 286 5. Landry GJ, Simon MM, Webb IC, Mistlberger RE (2006) Persistence of a behavioral food-  
287 anticipatory circadian rhythm following dorsomedial hypothalamic ablation in rats. *Am J*  
288 *Physiol - Regul Integr Comp Physiol* 290(6):1527–1534.  
289 <https://doi.org/10.1152/ajpregu.00874.2005>
- 290 6. Watts AG, Swanson LW, Sanchez-Watts G (1987) Efferent projections of the  
291 suprachiasmatic nucleus: I. Studies using anterograde transport of Phaseolus vulgaris  
292 leucoagglutinin in the rat. *J Comp Neurol* 258(2):204–229.  
293 <https://doi.org/10.1002/cne.902580204>
- 294 7. Garfield AS, Shah BP, Burgess CR, et al (2016) Dynamic GABAergic afferent modulation of  
295 AgRP neurons. *Nat Neurosci* 19(12):1628–1635. <https://doi.org/10.1038/nn.4392>
- 296 8. Gautron L, Lazarus M, Scott MM, Saper CB, Elmquist JK (2010) Identifying the efferent  
297 projections of leptin-responsive neurons in the dorsomedial hypothalamus using a novel  
298 conditional tracing approach. *J Comp Neurol* 518(11):2090–2108.  
299 <https://doi.org/10.1002/cne.22323>
- 300 9. Gooley JJ, Schomer A, Saper CB (2006) The dorsomedial hypothalamic nucleus is critical  
301 for the expression of food-entrainable circadian rhythms. *Nat Neurosci* 9(3):398–407.  
302 <https://doi.org/10.1038/nn1651>
- 303 10. Chou TC, Scammell TE, Gooley JJ, Gaus SE, Saper CB, Lu J (2003) Critical Role of  
304 Dorsomedial Hypothalamic Nucleus in a Wide Range of Behavioral Circadian Rhythms. *J*  
305 *Neurosci* 23(33):10691–10702. <https://doi.org/10.1523/jneurosci.23-33-10691.2003>
- 306 11. Kim JC, Cook MN, Carey MR, Shen C, Regehr WG, Dymecki SM (2009) Linking Genetically  
307 Defined Neurons to Behavior through a Broadly Applicable Silencing Allele. *Neuron*  
308 63(3):305–315. <https://doi.org/10.1016/j.neuron.2009.07.010>
- 309 12. Krashes MJ, Shah BP, Madara JC, et al (2014) An excitatory paraventricular nucleus to  
310 AgRP neuron circuit that drives hunger. *Nature* 507(7491):238–242.  
311 <https://doi.org/10.1038/nature12956>
- 312 13. Xu J, Bartolome CL, Low CS, et al (2018) Genetic identification of leptin neural circuits in  
313 energy and glucose homeostases. *Nature* 556:505–509. <https://doi.org/10.1038/s41586-018-0049-7>
- 314 14. Chao PT, Yang L, Aja S, Moran TH, Bi S (2011) Knockdown of NPY expression in the  
315 dorsomedial hypothalamus promotes development of brown adipocytes and prevents  
316

- 317 diet-induced obesity. *Cell Metab* 13(5):573–583.  
318 <https://doi.org/10.1016/j.cmet.2011.02.019>
- 319 15. Palmisano BT, Stafford JM, Pendergast JS (2017) High-Fat feeding does not disrupt daily  
320 rhythms in female mice because of protection by ovarian hormones. *Front Endocrinol*  
321 (Lausanne) 8(MAR):1–11. <https://doi.org/10.3389/fendo.2017.00044>
- 322 16. Drazen DL, Vahl TP, D’Alessio DA, Seeley RJ, Woods SC (2006) Effects of a Fixed Meal  
323 Pattern on Ghrelin Secretion: Evidence for a Learned Response Independent of Nutrient  
324 Status. *Endocrinology* 147(1):23–30. <https://doi.org/10.1210/en.2005-0973>
- 325 17. Challet E (2019) The circadian regulation of food intake. *Nat Rev Endocrinol* 15(7):393–  
326 405. <https://doi.org/10.1038/s41574-019-0210-x>
- 327 18. Huang W, Ramsey KM, Marcheva B, Bass J (2011) Circadian rhythms, sleep, and  
328 metabolism. *J Clin Invest* 121(6):2133–2141. <https://doi.org/10.1172/JCI46043>
- 329 19. Campos CA, Bowen AJ, Schwartz MW, Palmiter RD (2016) Parabrachial CGRP Neurons  
330 Control Meal Termination. *Cell Metab* 23(5):811–820.  
331 <https://doi.org/10.1016/j.cmet.2016.04.006>
- 332 20. Franklin KBJ, Paxinos G (2008) The mouse brain in stereotaxic coordinates. Acad Press
- 333 21. Kaiyala KJ, Ogimoto K, Nelson JT, Schwartz MW, Morton GJ (2015) Leptin signaling is  
334 required for adaptive changes in food intake, but not energy expenditure, in response to  
335 different thermal conditions. *PLoS One* 10(3):1–19.  
336 <https://doi.org/10.1371/journal.pone.0119391>  
337  
338
